# Supplementary material for: Salt-induced LCST-type thermal gelation of methylcellulose: quantifying non-specific interactionsviafluctuation theory
Source: Royal Society of Chemistry journal article supplement (doi:10.1039/d0cp01687j), 2020-01-01
Supplement: d0cp01687j1.pdf [file d0cp01687j1.pdf]

## Electronic Supplementary Information (ESI)

Salt-induced LCST-type thermal gelation of methylcellulose: Quantifying non-specific interactions via fluctuation theory

*Noriyuki Isobe*<sup>1,\*</sup> and *Seishi Shimizu*<sup>2,\*</sup>

1. Research Institute for Marine Resources Utilization, Japan Agency for Marine-Earth Science and Technology (JAMSTEC), 2-15 Natsushima-cho, Yokosuka 237-0061, Japan

2. York Structural Biology Laboratory, Department of Chemistry, University of York, Heslington, York, YO10 5DD, United Kingdom

### 1. Data extraction

The extraction of data from the literature was performed with a software (Engauge Digitizer, version 10.1).

### 2. Figures used in KBI calculation

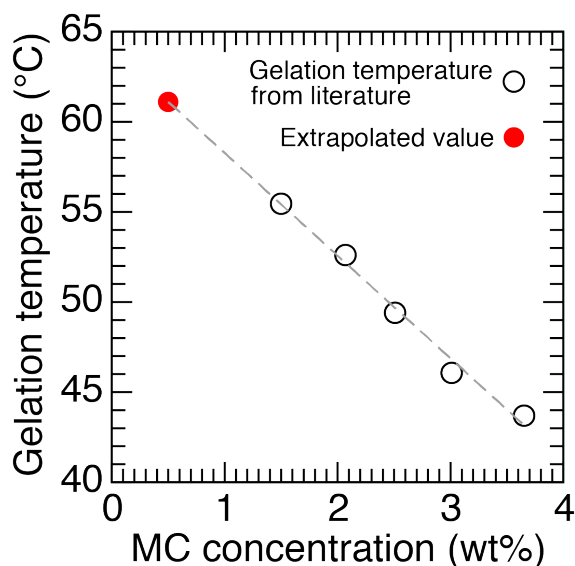

**Fig. S1.** Gelation temperature plotted upon MC concentration (open circles) and extrapolated value at gelation temperature of 61.1°C (filled circle in red).

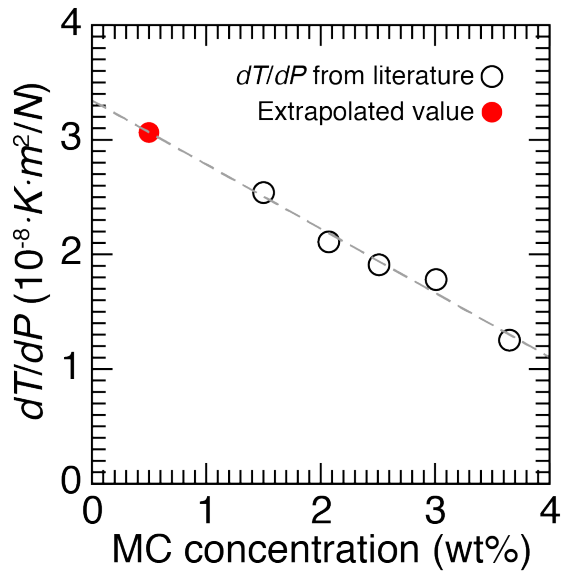

**Fig. S2.**  $\frac{\delta T_{S \rightarrow g}}{\delta P}$  values plotted upon MC concentration (open circles) and extrapolated value at MC concentration of 0.5 wt% (filled circle in red).

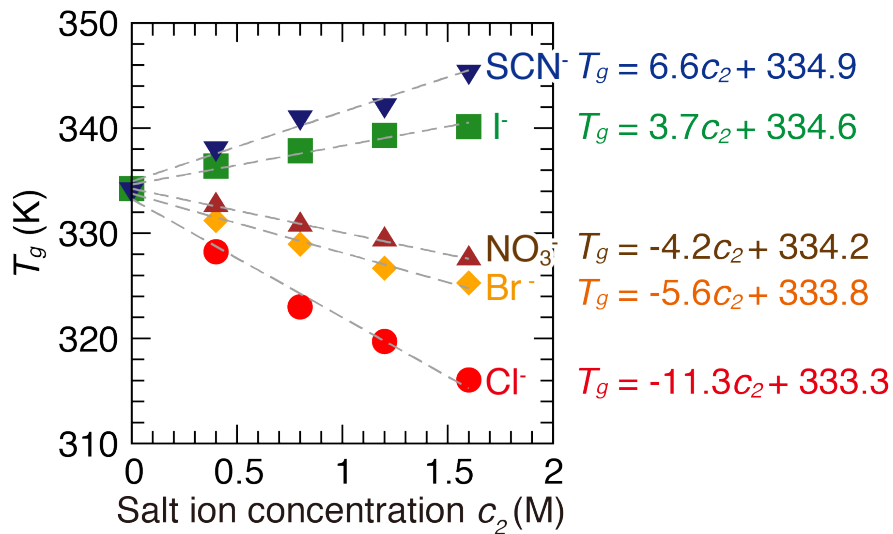

**Fig. S3.**  $T_g$  upon ion concentration  $c_2$  of NaCl ( $Cl^-$ ), NaBr ( $Br^-$ ), NaNO<sub>3</sub> ( $NO_3^-$ ), NaI ( $I^-$ ), and NaSCN ( $SCN^-$ ).

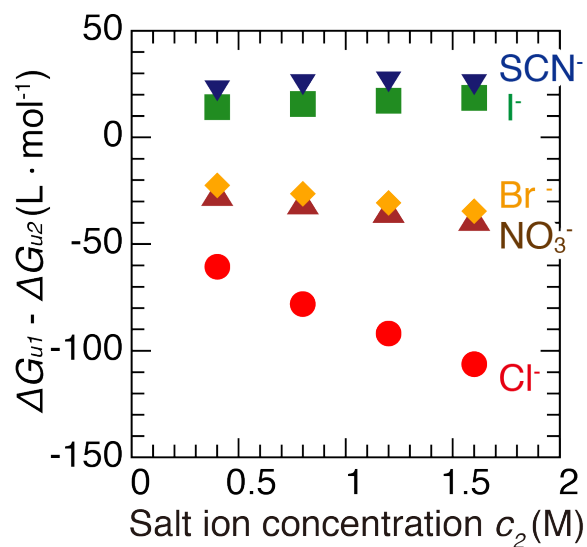

**Fig. S4.**  $\Delta G_{u1} - \Delta G_{u2}$  upon ion concentration  $c_2$  of NaCl ( $\text{Cl}^-$ ), NaBr ( $\text{Br}^-$ ),  $\text{NaNO}_3$  ( $\text{NO}_3^-$ ), NaI ( $\text{I}^-$ ), and NaSCN ( $\text{SCN}^-$ ).

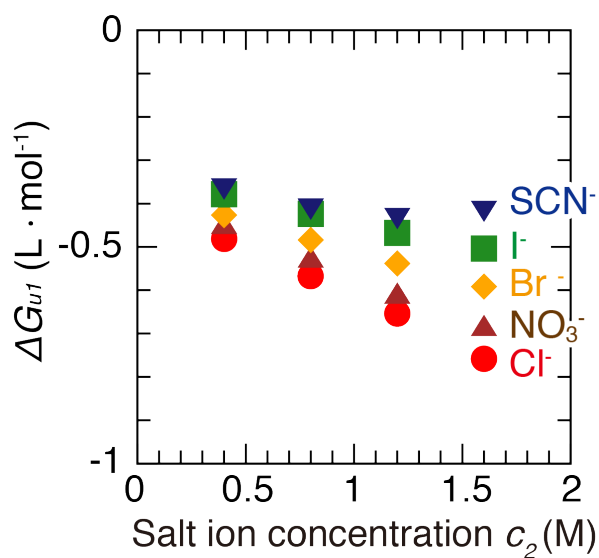

**Fig. S5.**  $\Delta G_{u1}$  upon ion concentration  $c_2$  of NaCl ( $\text{Cl}^-$ ), NaBr ( $\text{Br}^-$ ),  $\text{NaNO}_3$  ( $\text{NO}_3^-$ ), NaI ( $\text{I}^-$ ), and NaSCN ( $\text{SCN}^-$ ).
